# Supplementary material for: SAVI, in silico generation of billions of easily synthesizable compounds through expert-system type rules
Source: PubMed Central journal article supplement (PMC7658252; doi:10.1038/s41597-020-00727-4), 2020-11-11

## **Supplementary Information for: “SAVI, in silico generation of billions of easily synthesizable compounds through expert-system type rules”**

Hitesh Patel<sup>1</sup>, Wolf-Dietrich Ihlenfeldt<sup>2</sup>, Philip N. Judson<sup>3</sup>, Yurii Moroz<sup>4</sup>, Yuri Pevzner<sup>1,5</sup>, Megan L. Peach<sup>6</sup>, Victorien Delannée<sup>1</sup>, Nadya Tarasova<sup>7</sup>, Marc C. Nicklaus<sup>1</sup>

<sup>1</sup>*Computer-Aided Drug Design Group, Chemical Biology Laboratory, Center for Cancer Research, National Cancer Institute, National Institutes of Health, Frederick, MD 21702, USA.*

<sup>2</sup>*Xemistry GmbH, Schwalbenweg 5, D-61479 Glashütten, Germany.*

<sup>3</sup>*Heather Lea, Bland Hill, Norwood, Harrogate HG3 1TE, England.*

<sup>4</sup>*Enamine Ltd, 78 Chervonotkatska Street, Suite 1, Kyiv, 02094, Ukraine and Chemspace LLC, 85 Chervonotkatska Street, Suite 1, Kyiv, 02094, Ukraine*

<sup>5</sup>*AbbVie, Inc., North Chicago, IL 60064, USA*

<sup>6</sup>*Basic Science Program, Frederick National Laboratory for Cancer Research, Frederick, MD 21702*

<sup>7</sup>*Synthetic Biologics and Drug Discovery Group, Laboratory of Cancer Immunometabolism, Center for Cancer Research, National Cancer Institute, National Institutes of Health, Frederick, MD 21702, USA.*

## Table of Contents

|                                                                          |           |
|--------------------------------------------------------------------------|-----------|
| <b>1. Products Properties List.....</b>                                  | <b>3</b>  |
| <b>2. Reactions Properties List .....</b>                                | <b>4</b>  |
| <b>3. Fields of SD file of a SAVI product.....</b>                       | <b>6</b>  |
| <b>4. Additional plots of property distribution for “Plus” set .....</b> | <b>9</b>  |
| <b>5. Plots of property distribution for “Neg0” set .....</b>            | <b>11</b> |
| <b>6. Plots of property distribution for “Neg10” set .....</b>           | <b>14</b> |
| <b>7. Plots of property distribution for “Neg20” set .....</b>           | <b>17</b> |
| <b>8. Plots of property distribution for “Neg30” set .....</b>           | <b>20</b> |

## 1. Products Properties List

SAVI\_ID - Product name, SAVI ID

HASHCODE - Product Hashcode

SMILES - Product SMILES

FORMULA - Molecular formula

WEIGHT - Molecular weight

NROTBONDS - Number of rotatable bonds

NHDONORS - Number of H-bond donors

NHACCEPTORS - Number of H-bond acceptors

TPSA - Total polar surface area

FSP3 - Fraction of sp<sup>3</sup>-hybridized carbons

COMPLEXITY - Complexity (see: W. D. Ihlenfeldt, Ph.D. Thesis, TU Munich, Germany, 1991)

CHEMICAL\_BEAUTY - QED score of the product

BENZENOID\_INDEX - Benzenoid index

CHARGED\_GROUP\_COUNTS - Number of charged groups

HYDROGEN\_BOND\_CENTER\_COUNT - Number of hydrogen bond centers

HEAVY\_ATOM\_COUNT - Number of heavy atoms

STEREO\_COUNT - Number of stereo centers

RINGSYSTEM\_COUNT - No. of ring systems

NESSSR - Number of extended smallest set of smallest rings (ESSSR)

NSSSR - Number of smallest set of smallest rings (SSSR)

ARORING\_COUNT - No. of aromatic rings

ALIRING\_COUNT - No. of aliphatic rings

STDINCHI - Standard InChI

STDINCHIKEY - Standard InChI-Key

STEREO\_TAUTO\_HASH - tautomer-insensitive hashcode

RULE\_OF\_5\_VIOLATIONS - Number of Lipinski "rule of 5" violations

RULE\_OF\_3\_VIOLATIONS - Number of "rule of 3 violations"

SAVI\_PAINS\_FILTER\_MATCH\_COUNT - PAINS Filter Match

SAVI\_PAINS\_FILTER\_MATCH\_NAME - Name of the PAINS filter match

GENOTOXIC\_ALERTS - Genotoxic alerts (see: CE&N Sep 27, 2010, p16ff)

XLOGP2 - Xlogp2

XLOGP - Xlogp

SAVI\_BRUNS\_WATSON\_DEMERIT\_SCORE - Bruns and Watson Demerit score (see Bruns, R.F., Watson, I.A. Rules for identifying potentially reactive or promiscuous compounds. J. Med. Chem. 2012, 55,9763-9772)

SAVI\_BRUNS\_WATSON\_DEMERIT\_COMPONENTS - Breakdown of Bruns and Watson Demerits

## 2. Reactions Properties List

SAVI\_PROPOSED\_TRANSFORM - Name of the reaction

SAVI\_PROPOSED\_TRANSFORM\_ID - ID of the reaction (LHASA ID of the transform that describes this reaction)

SAVI\_REACTION\_HASHCODE - Hashcode of the reaction

SAVI\_REACTION\_SMILES - Atom-mapped SMILES of the reaction

SAVI\_LHASA\_SCORE - "Quality" score of this reaction according to LHASA transform scoring scheme

SAVI\_LHASA\_SCORING\_DELTAPOINTS - Score penalties or rewards given to the reaction

SAVI\_LHASA\_SCORING\_CLASS - Scoring class of the reaction according to highest delta points

SAVI\_REACTION\_CONDITIONS - Predicted reaction conditions according to LHASA transform rules

SAVI\_REACTION\_ACTUAL\_CONDITIONS - Reaction conditions according to LHASA transform rules

SAVI\_REACTION\_WARNINGS - Reaction warnings according to LHASA transform rules

SAVI\_SSSR\_COUNT\_CHANGE - SSSR count in product minus combined SSSR count in building blocks

SAVI\_ALIRING\_COUNT\_CHANGE - No. of aliphatic rings changes in reaction

SAVI\_ARORING\_COUNT\_CHANGE - No. of aromatic rings changes in reaction

SAVI\_RINCHI - RInChI of the reaction

SAVI\_LONG\_RINCHIKEY - Long-RInChIKey of the reaction

SAVI\_SHORT\_RINCHIKEY - Short-RInChIKey of the reaction

SAVI\_WEB\_RINCHIKEY - Web-RInChIKey of the reaction

SAVI\_BUILDING\_BLOCK\_A\_HASHISY - Hashcode of building block A

SAVI\_BUILDING\_BLOCK\_A\_SMILES - SMILES of building block A

SAVI\_BUILDING\_BLOCK\_A\_BBSOURCE - Source with version of building block A (ENAMINE2019Q4 for this whole SAVI)

SAVI\_BUILDING\_BLOCK\_A\_STRID - Enamine catalog ID of building block A

SAVI\_BUILDING\_BLOCK\_A\_INCHI - InChI of building block A

SAVI\_BUILDING\_BLOCK\_A\_INCHIKEY - InChIKey of building block A

SAVI\_BUILDING\_BLOCK\_A\_PROTECTION\_NEEDED - Indicates whether protection of reagent A is required in this reaction

SAVI\_BUILDING\_BLOCK\_A\_PROTECTED - Indicates whether building block A used in this reaction is already a protected version of the required reagent

SAVI\_BUILDING\_BLOCK\_A\_ORDER\_LINK - URL of the Enamine catalog web page for building block A

SAVI\_BUILDING\_BLOCK\_B\_HASHISY - Hashcode of building block B

SAVI\_BUILDING\_BLOCK\_B\_SMILES - SMILES of building block B

SAVI\_BUILDING\_BLOCK\_B\_BBSOURCE - Source with version of building block B (ENAMINE2019Q4 for this whole SAVI)

SAVI\_BUILDING\_BLOCK\_B\_STRID - Enamine catalog ID of building block B

SAVI\_BUILDING\_BLOCK\_B\_INCHI - InChI of building block B

SAVI\_BUILDING\_BLOCK\_B\_INCHIKEY - InChIKey of building block B

SAVI\_BUILDING\_BLOCK\_B\_PROTECTION\_NEEDED - Indicates whether protection of reagent B is required in this reaction

SAVI\_BUILDING\_BLOCK\_B\_PROTECTED - Indicates whether building block B used in this reaction is already a protected version of the required reagent

SAVI\_BUILDING\_BLOCK\_B\_ORDER\_LINK - URL of the Enamine catalog web page for building block B

### 3. Fields of SD file of a SAVI product

><E\_SAVI\_ID>  
><E\_SMILES>  
><E\_HASHISY>  
><E\_FORMULA>  
><E\_WEIGHT>  
><E\_NROTBONDS>  
><E\_NHDONORS>  
><E\_NHACCEPTORS>  
><E\_SAVI\_PROTECTED>  
><E\_TPSA>  
><E\_FSP3>  
><E\_COMPLEXITY>  
><E\_CHEMICAL\_BEAUTY>  
><E\_BENZENOID\_INDEX>  
><E\_CHARGED\_GROUP\_COUNTS>  
><E\_HYDROGEN\_BOND\_CENTER\_COUNT>  
><E\_HEAVY\_ATOM\_COUNT>  
><E\_STEREO\_COUNT>  
><E\_RINGSYSTEM\_COUNT>  
><E\_NESSSR>  
><E\_NSSSR>  
><E\_ALIRING\_COUNT>  
><E\_ARORING\_COUNT>  
><E\_SAVI\_PAINS\_FILTER\_MATCH\_COUNT>  
><E\_SAVI\_PAINS\_FILTER\_MATCH\_NAME>  
><E\_RULE\_OF\_5\_VIOLATIONS>  
><E\_GENOTOXIC\_ALERTS>  
><E\_XLOGP2>  
><E\_STEREO\_TAUTO\_HASH>  
><E\_SAVI\_BRUNS\_WATSON\_DEMERIT\_SCORE>

><E\_SAVI\_BRUNS\_WATSON\_DEMERIT\_COMPONENTS>  
><E\_SAVI\_PROPOSED\_TRANSFORM>  
><E\_SAVI\_PROPOSED\_TRANSFORM\_ID>  
><E\_SAVI\_REACTION\_HASHCODE>  
><E\_SAVI\_REACTION\_SMILES>  
><E\_SAVI\_LHASA\_SCORE>  
><E\_SAVI\_LHASA\_SCORING\_DELTAPOINTS>  
><E\_SAVI\_LHASA\_SCORING\_CLASS>  
><E\_SAVI\_REACTION\_CONDITIONS>  
><E\_SAVI\_REACTION\_ACTUAL\_CONDITIONS>  
><E\_SAVI\_REACTION\_WARNINGS>  
><E\_SAVI\_SSSR\_COUNT\_CHANGE>  
><E\_SAVI\_ALIRING\_COUNT\_CHANGE>  
><E\_SAVI\_ARORING\_COUNT\_CHANGE>  
><E\_SAVI\_RINCHI>  
><E\_SAVI\_LONG\_RINCHIKEY>  
><E\_SAVI\_SHORT\_RINCHIKEY>  
><E\_SAVI\_WEB\_RINCHIKEY>  
><E\_SAVI\_BUILDING\_BLOCK\_A\_HASHISY>  
><E\_SAVI\_BUILDING\_BLOCK\_A\_SMILES>  
><E\_SAVI\_BUILDING\_BLOCK\_A\_BBSOURCE>  
><E\_SAVI\_BUILDING\_BLOCK\_A\_STRID>  
><E\_SAVI\_BUILDING\_BLOCK\_A\_INCHI>  
><E\_SAVI\_BUILDING\_BLOCK\_A\_INCHIKEY>  
><E\_SAVI\_BUILDING\_BLOCK\_A\_PROTECTION\_NEEDED>  
><E\_SAVI\_BUILDING\_BLOCK\_A\_PROTECTED>  
><E\_SAVI\_BUILDING\_BLOCK\_A\_ORDER\_LINK>  
><E\_SAVI\_BUILDING\_BLOCK\_B\_HASHISY>  
><E\_SAVI\_BUILDING\_BLOCK\_B\_SMILES>  
><E\_SAVI\_BUILDING\_BLOCK\_B\_BBSOURCE>  
><E\_SAVI\_BUILDING\_BLOCK\_B\_STRID>  
><E\_SAVI\_BUILDING\_BLOCK\_B\_INCHI>

><E\_SAVI\_BUILDING\_BLOCK\_B\_INCHIKEY>  
><E\_SAVI\_BUILDING\_BLOCK\_B\_PROTECTION\_NEEDED>  
><E\_SAVI\_BUILDING\_BLOCK\_B\_PROTECTED>  
><E\_SAVI\_BUILDING\_BLOCK\_B\_ORDER\_LINK>



## 4. Additional plots of property distribution for “Plus” set

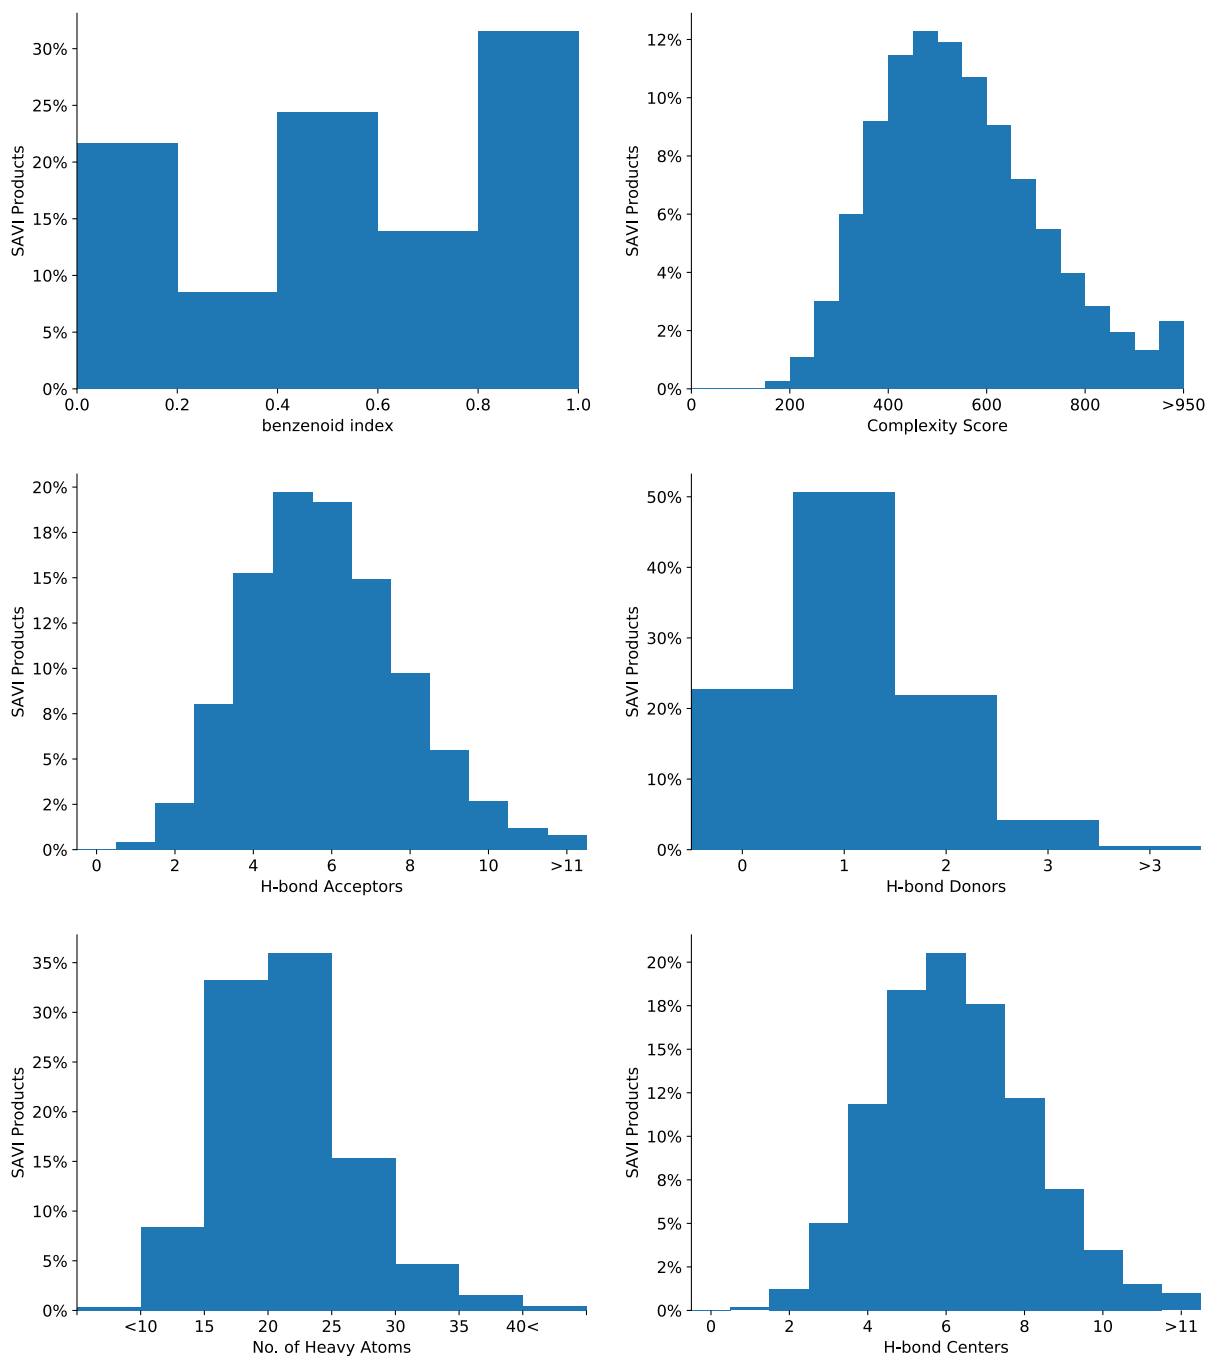

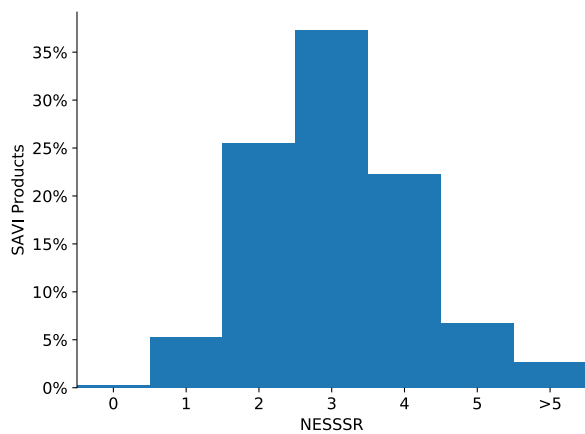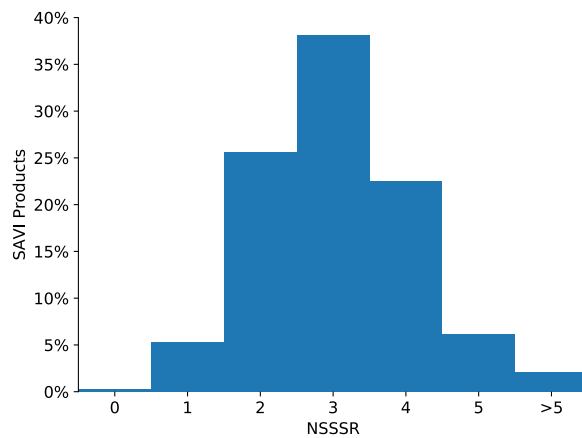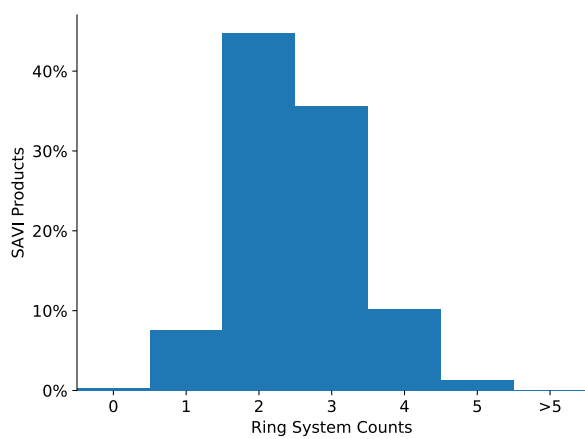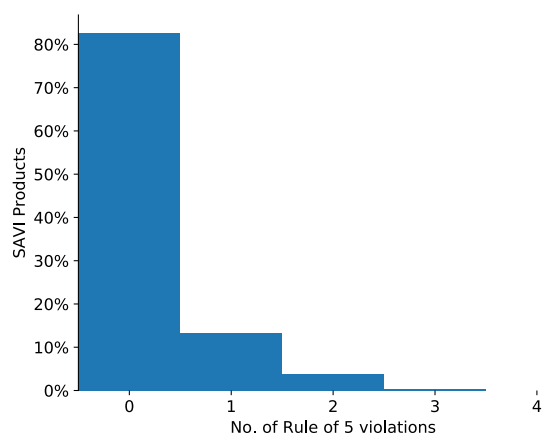

## 5. Plots of property distribution for “Neg0” set

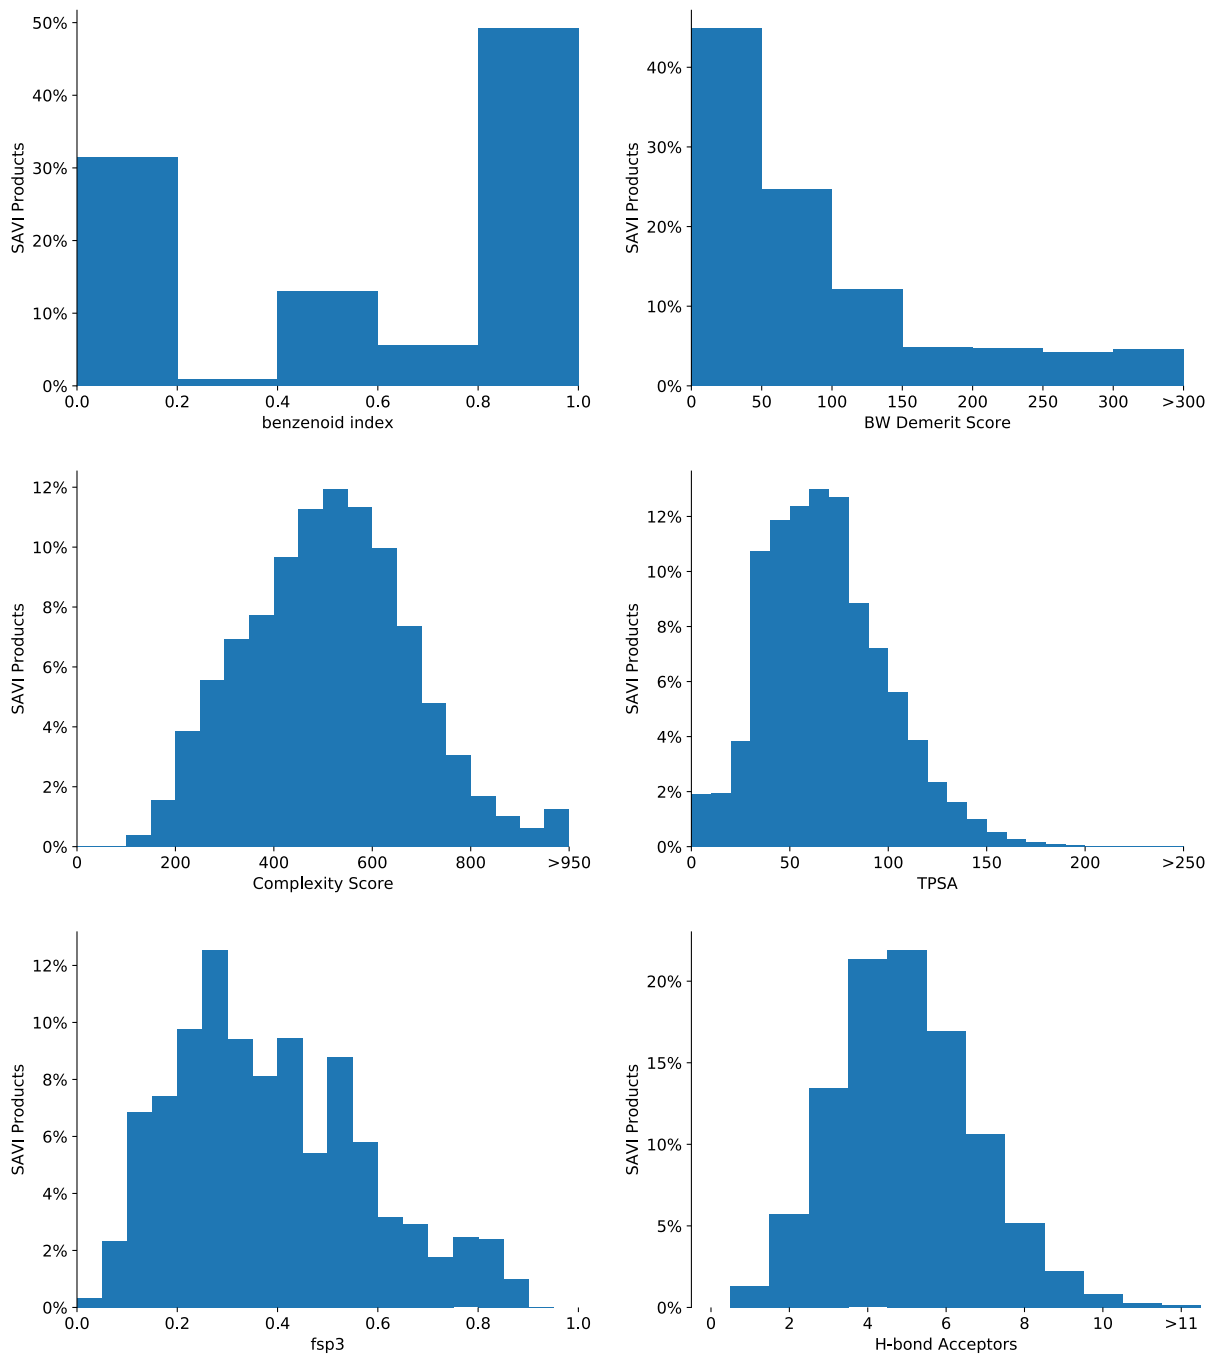

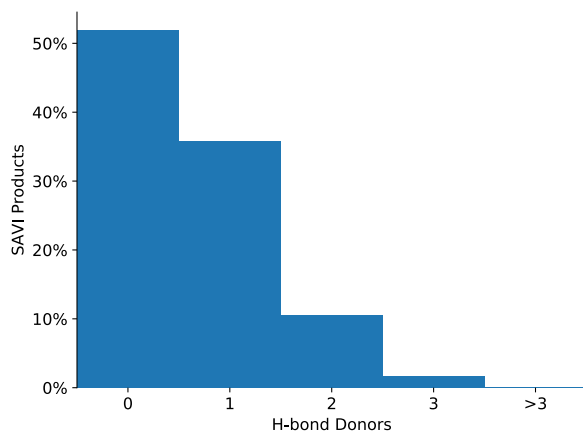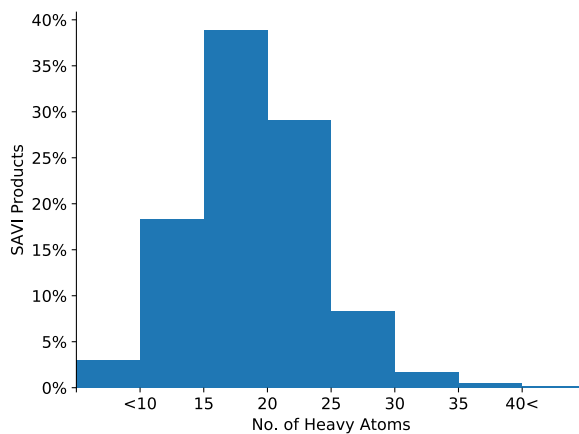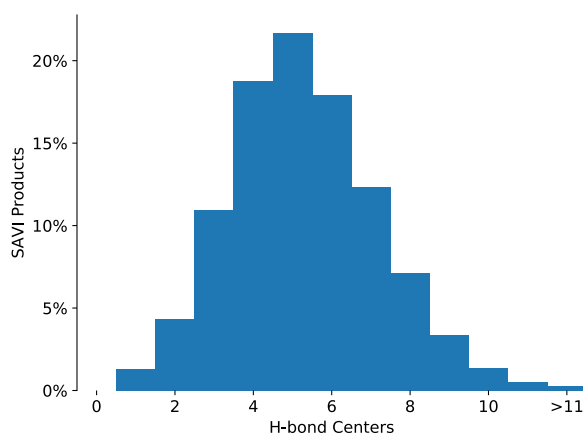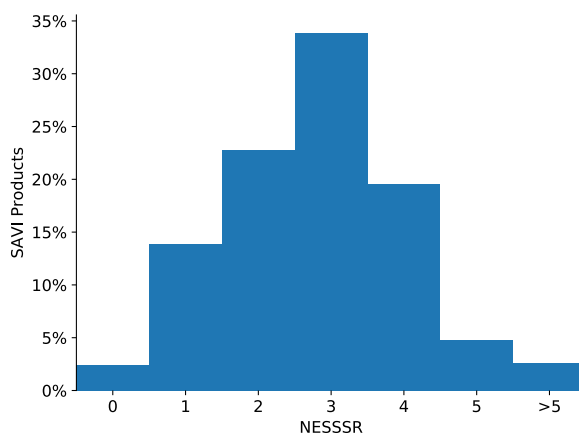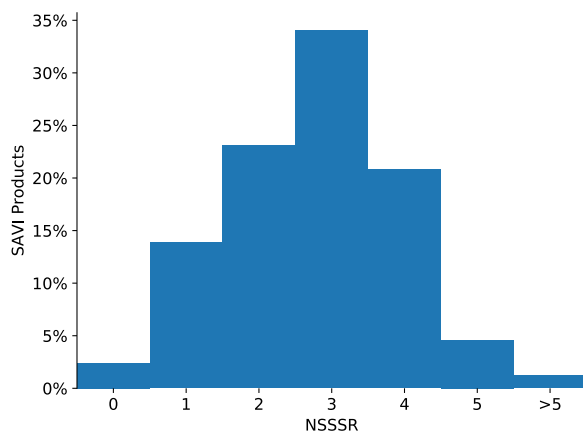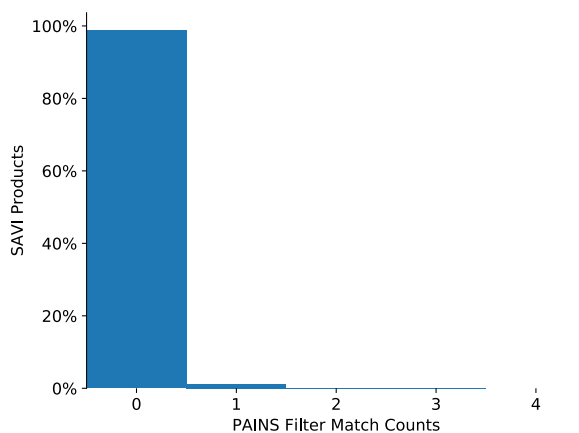

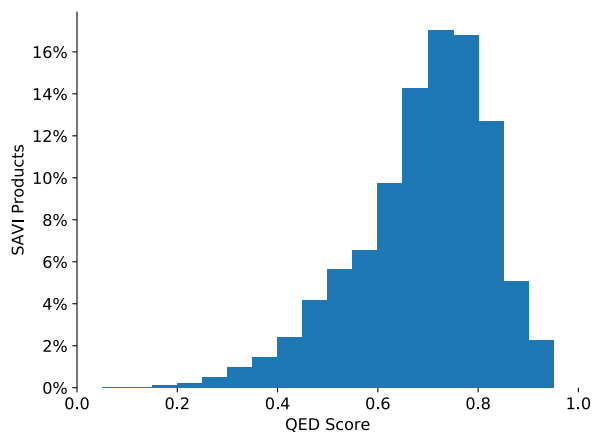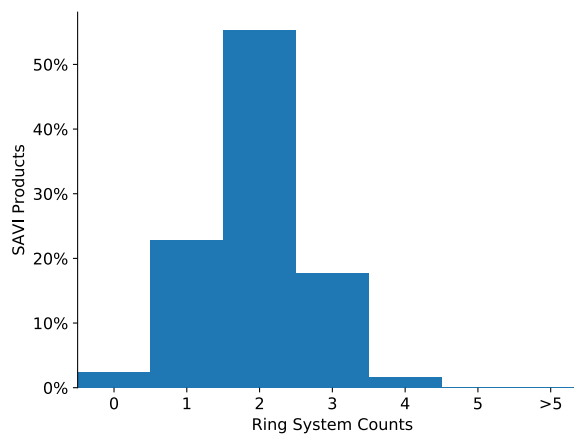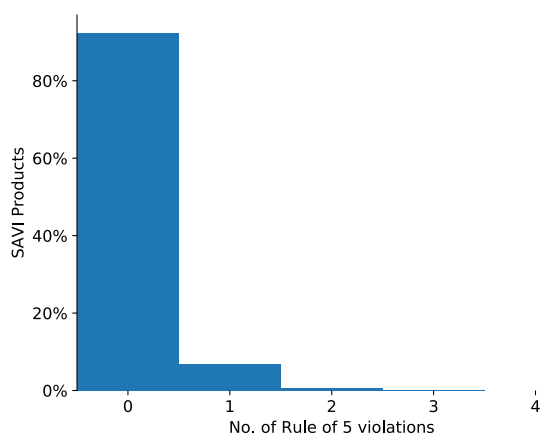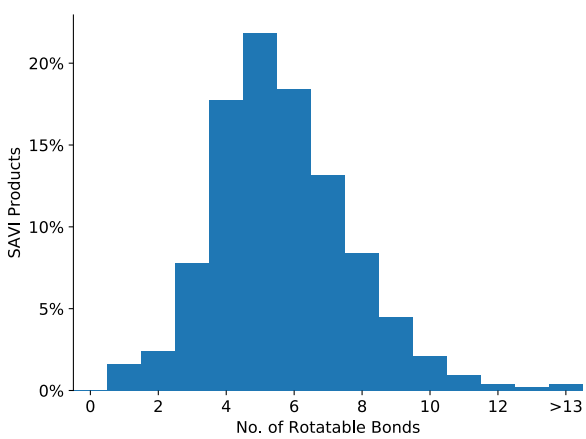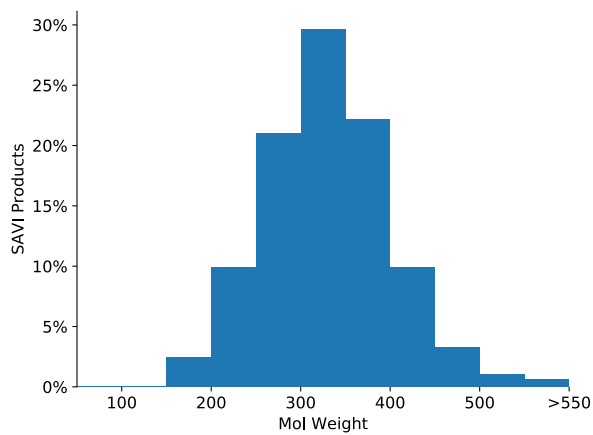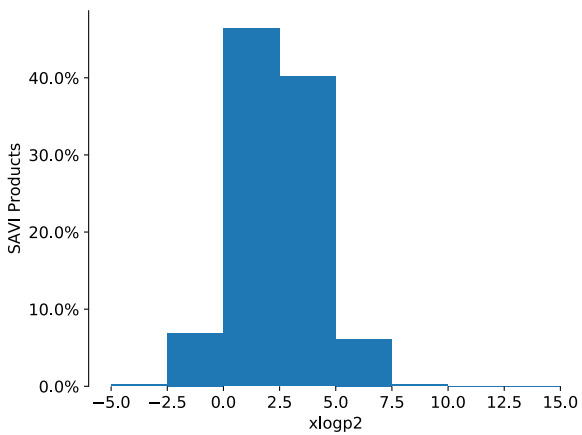

## 6. Plots of property distribution for “Neg10” set

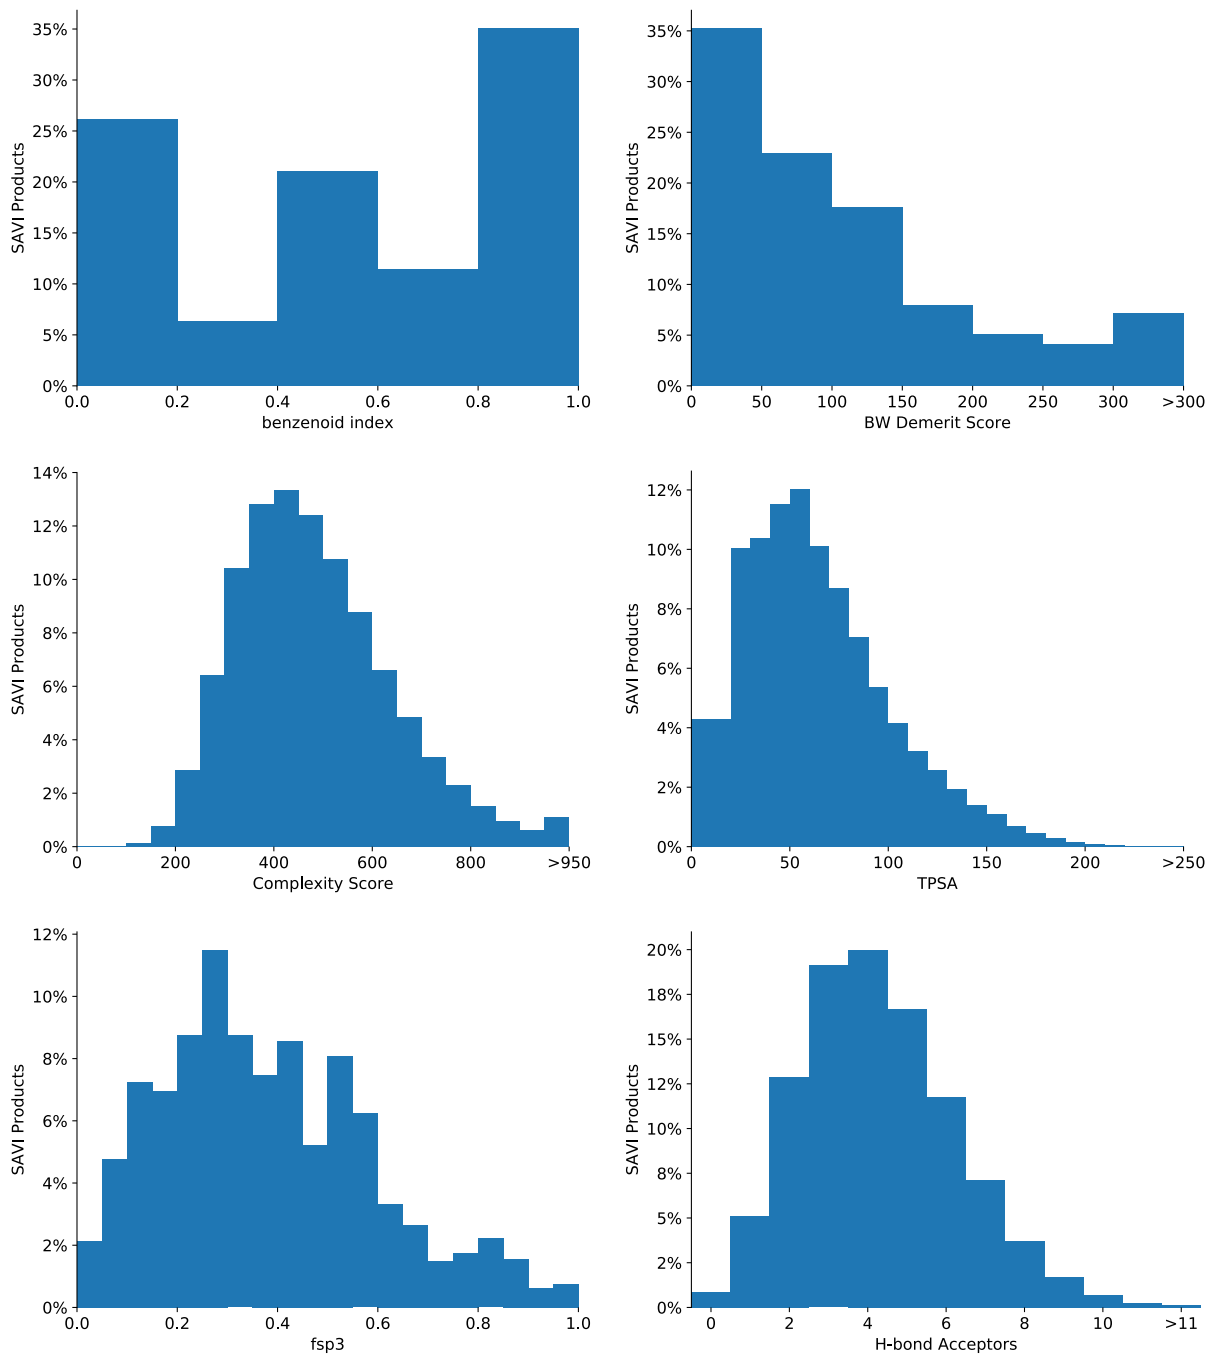

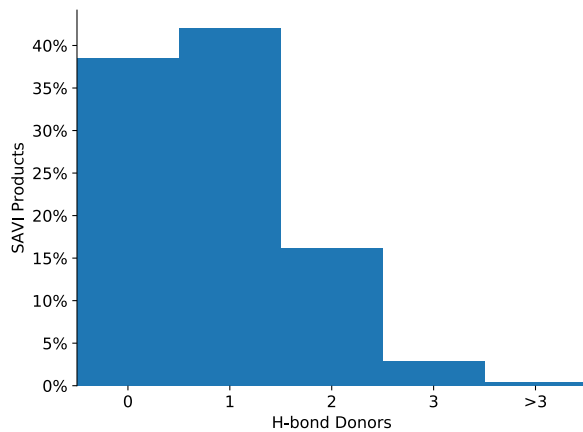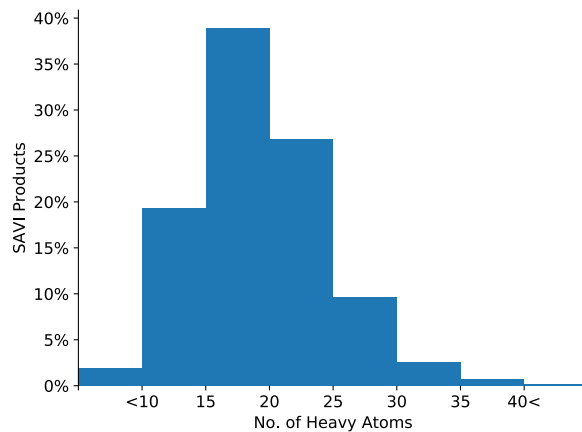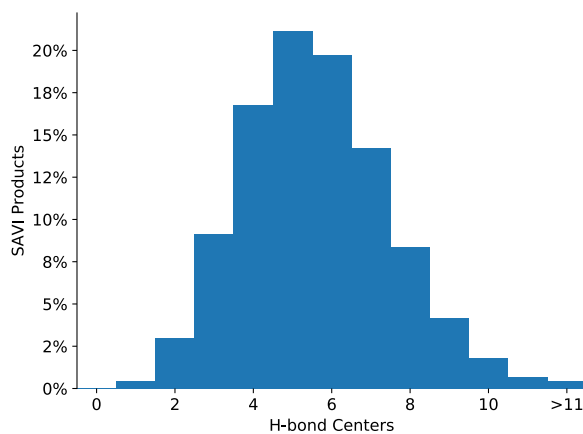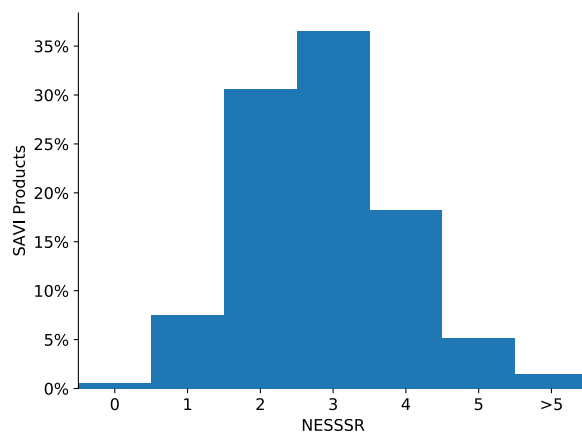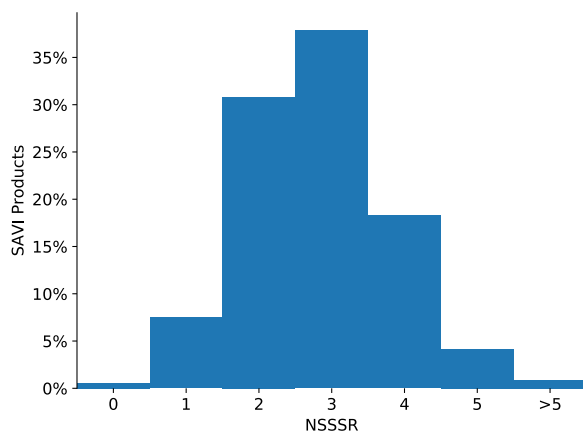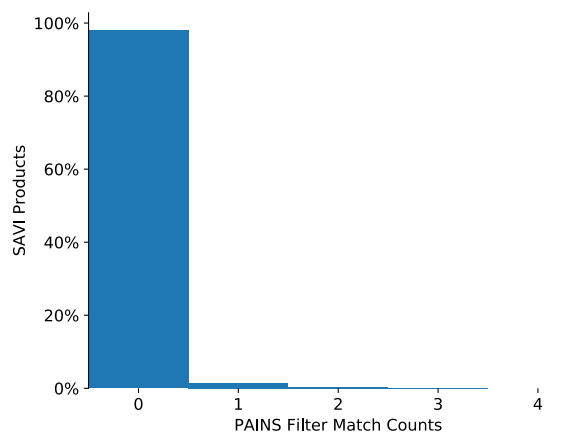

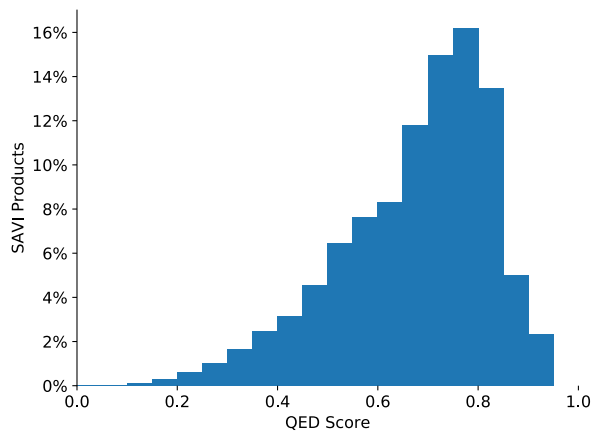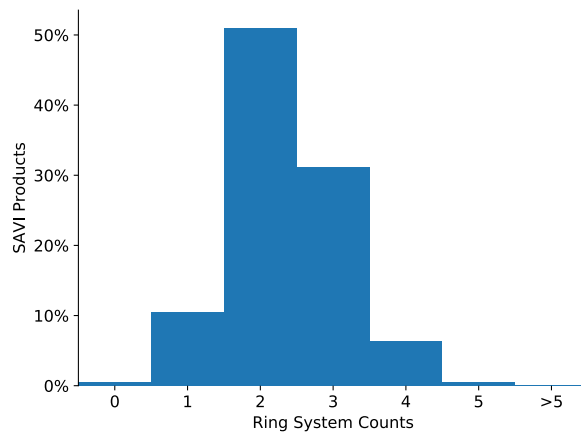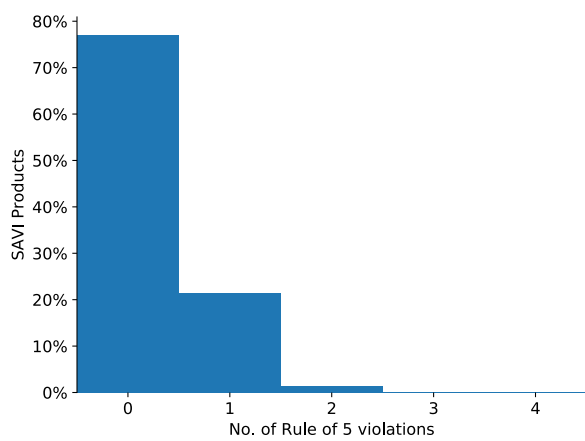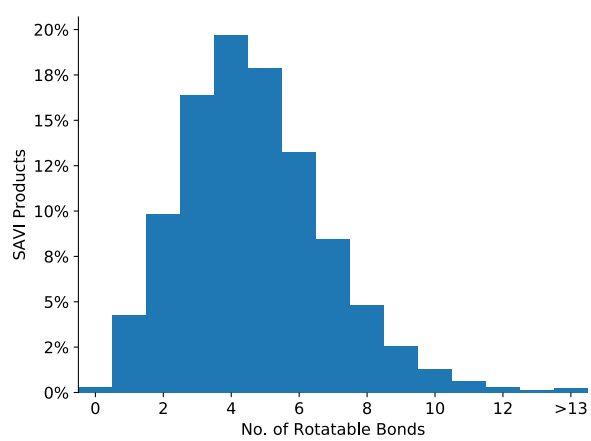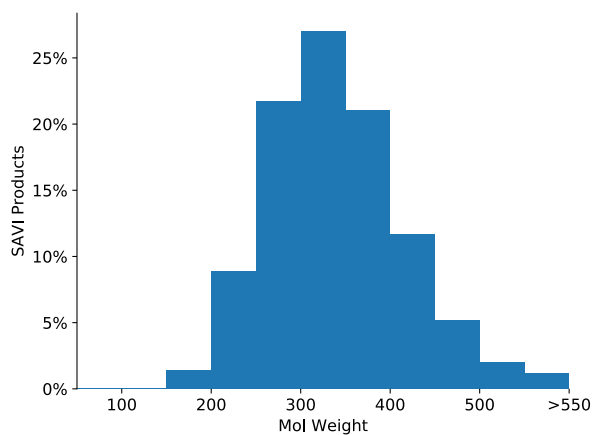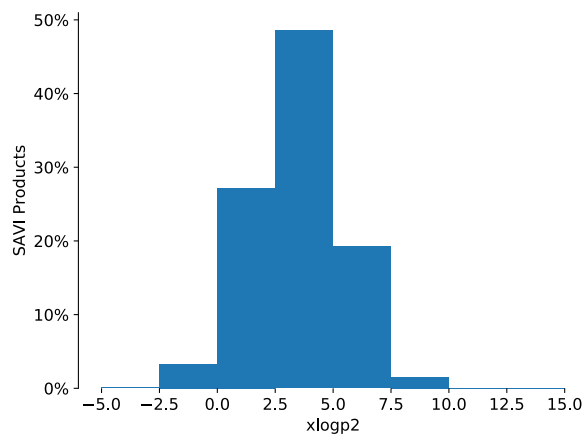



## 7. Plots of property distribution for “Neg20” set

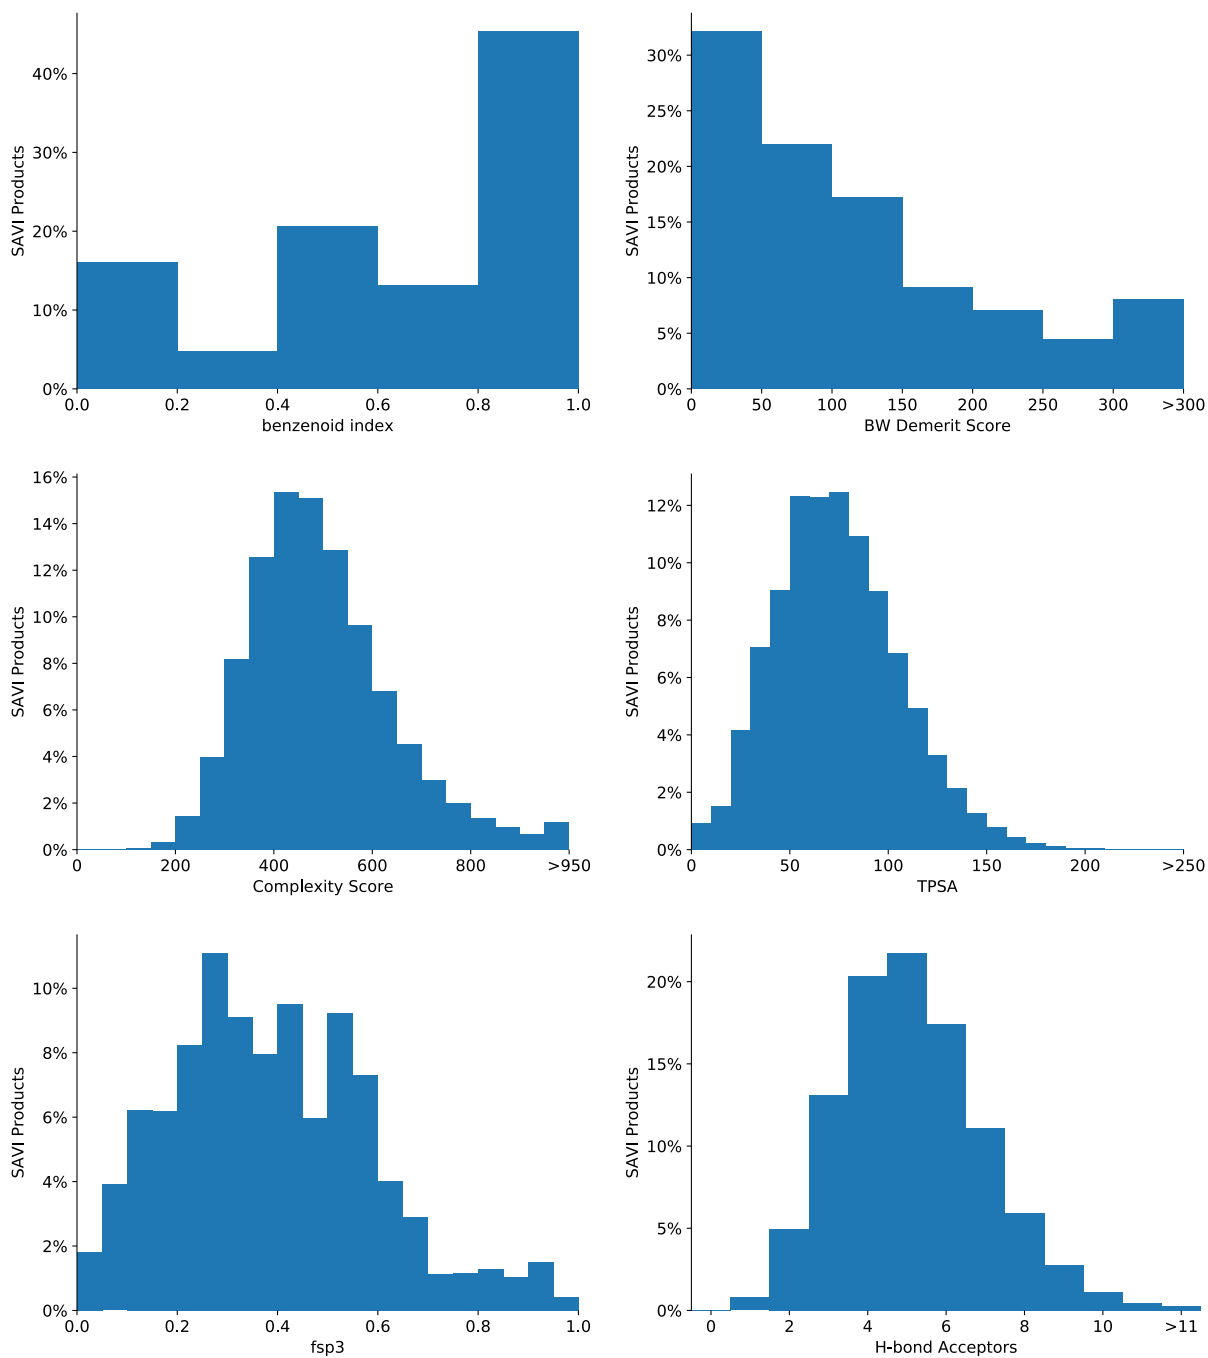

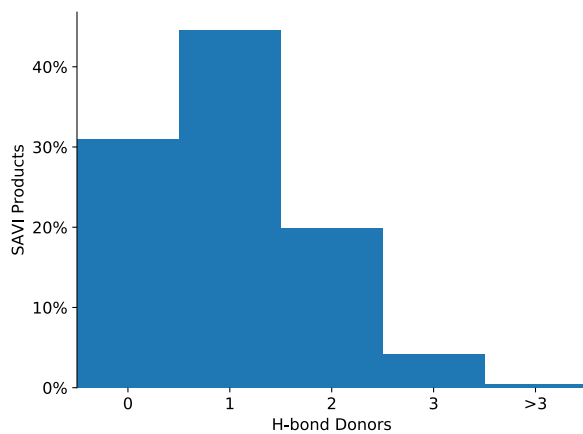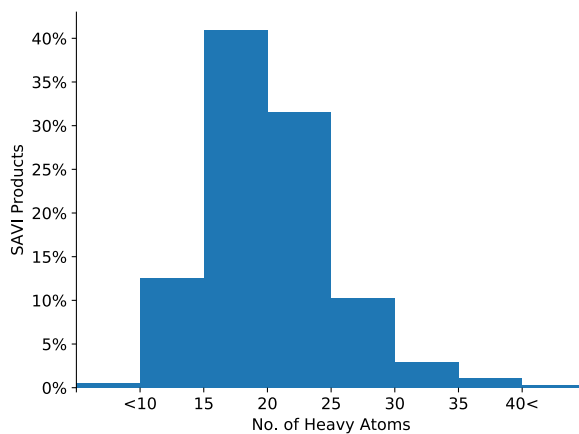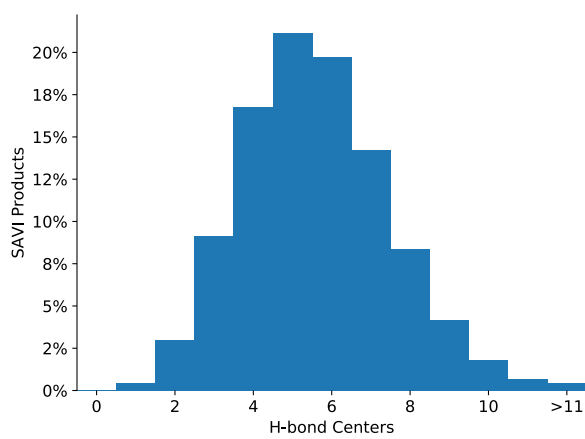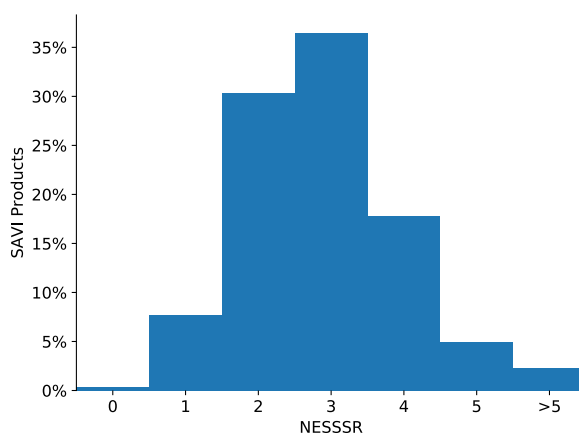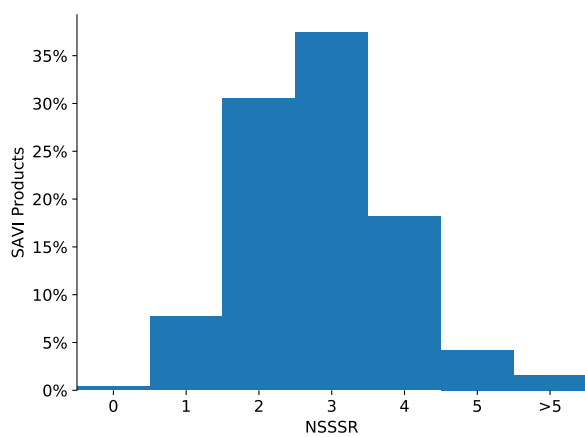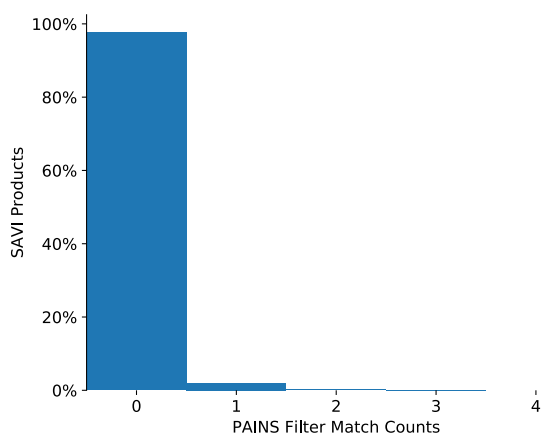

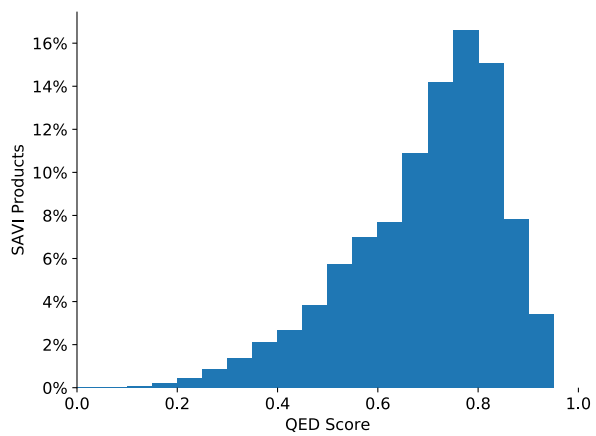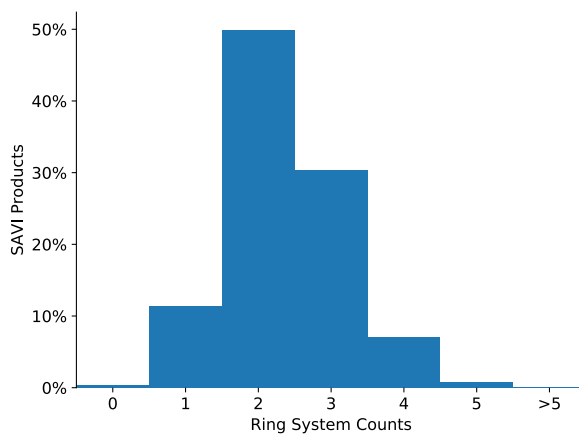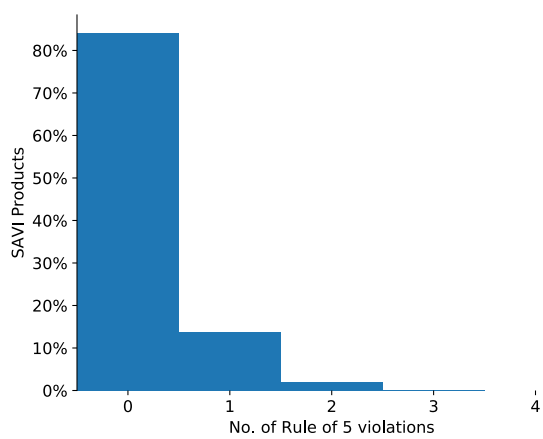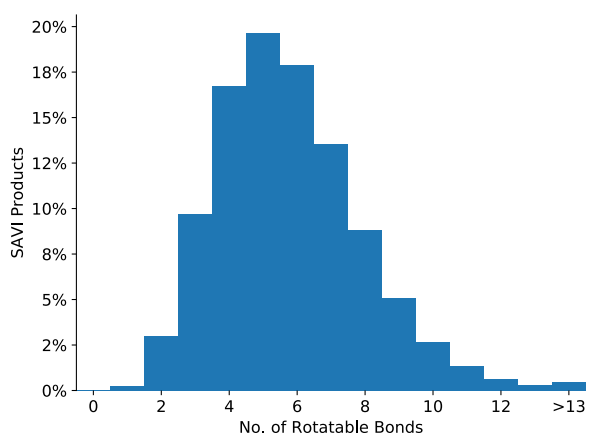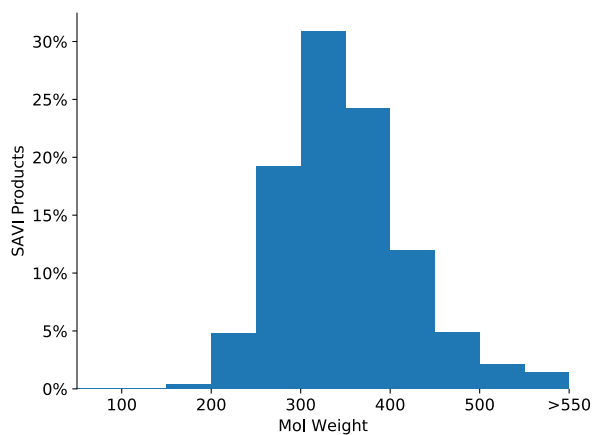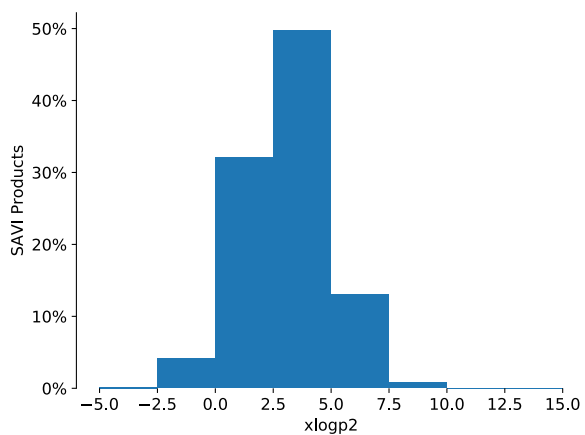

## 8. Plots of property distribution for “Neg30” set

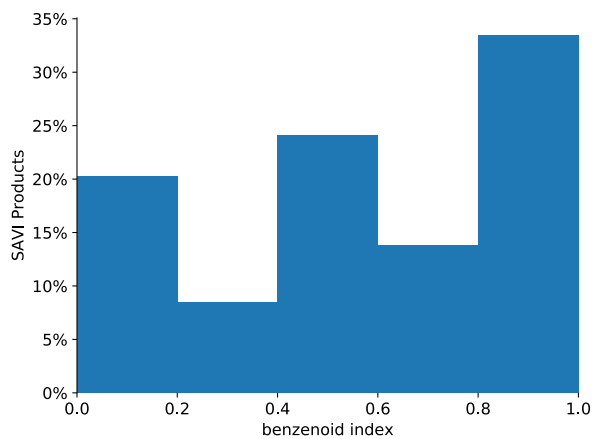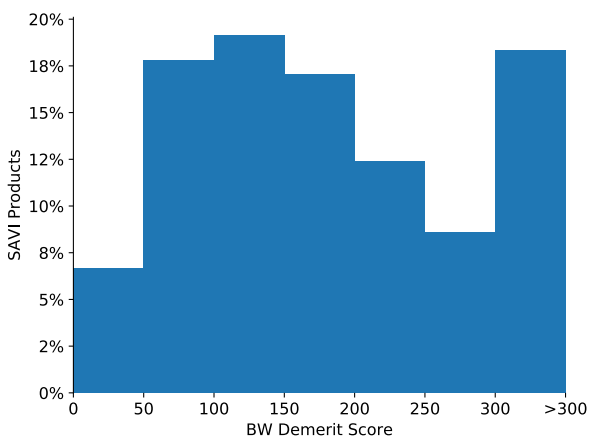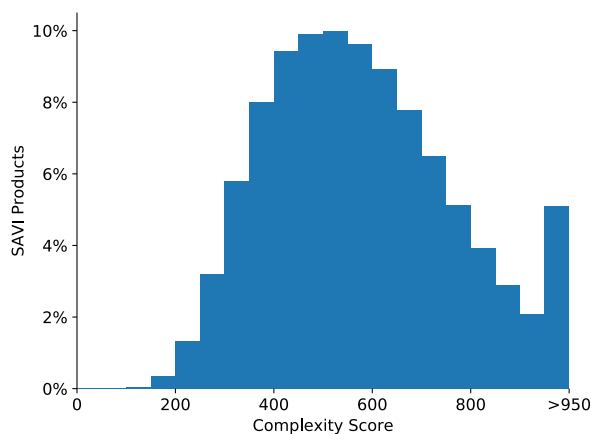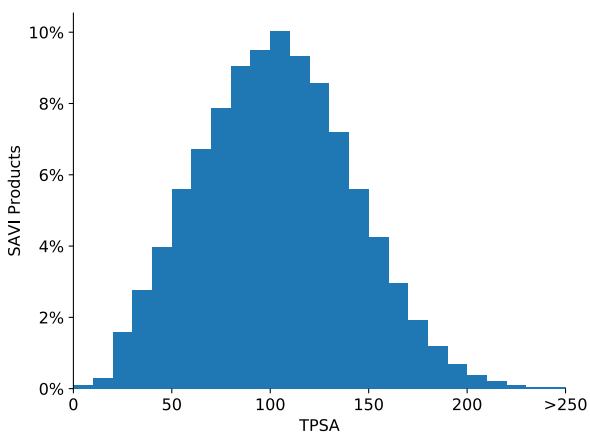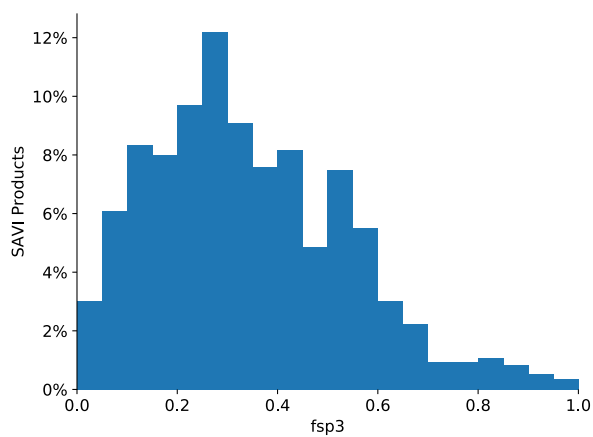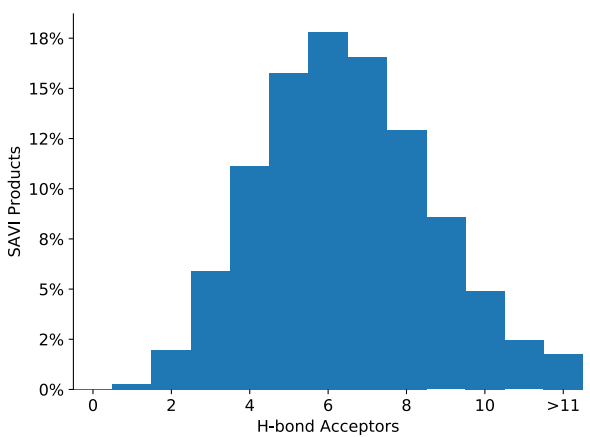

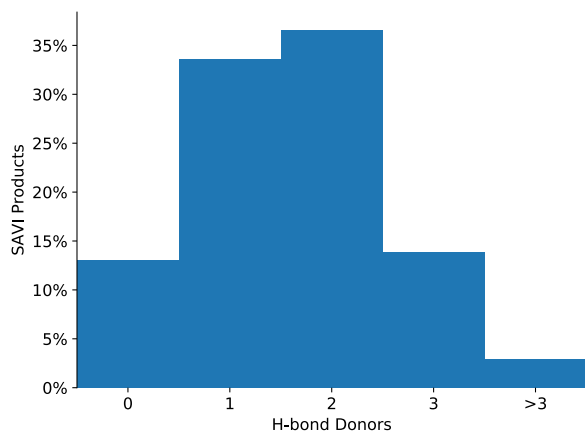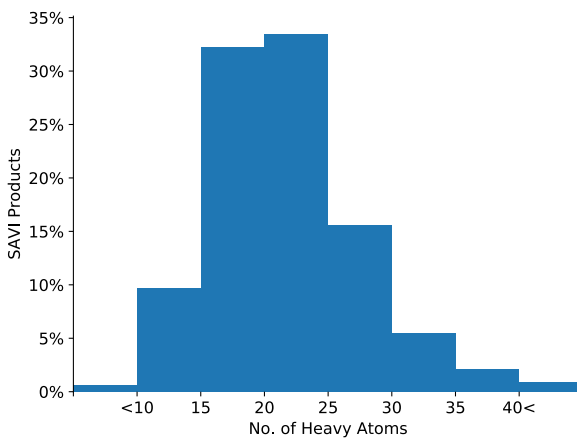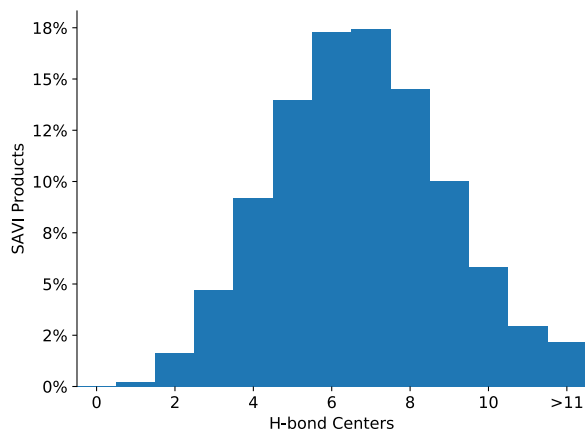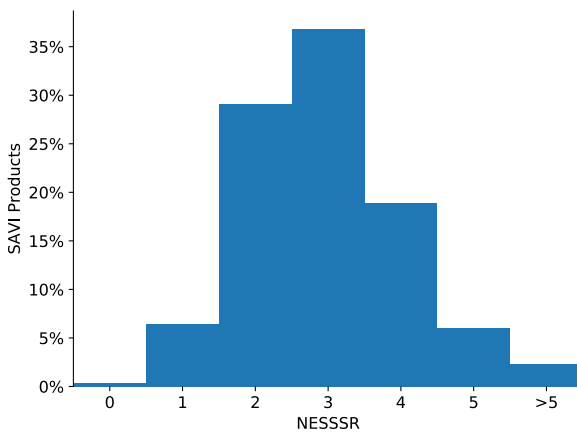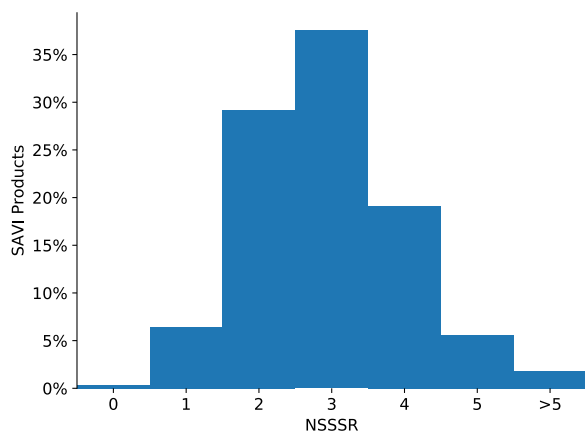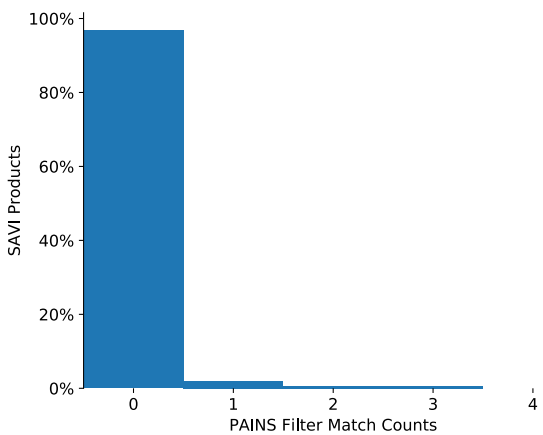

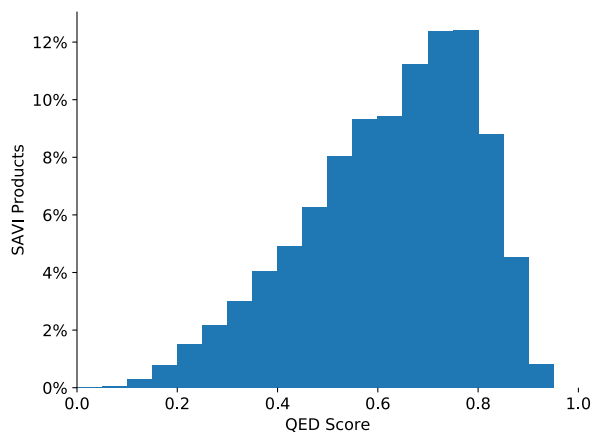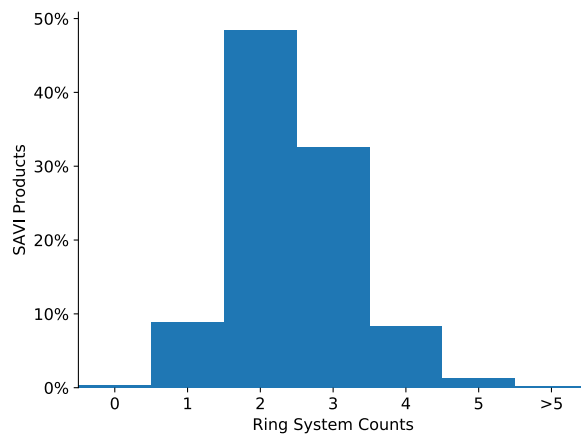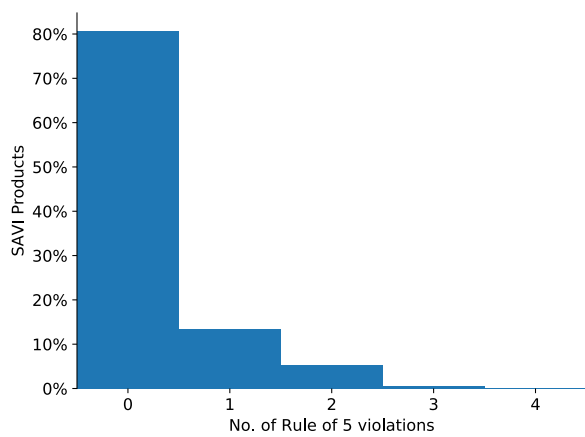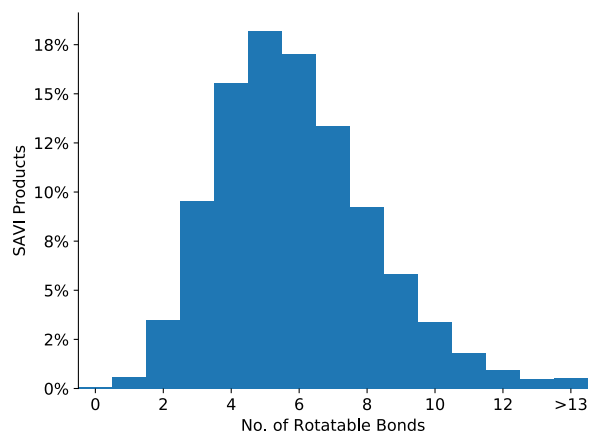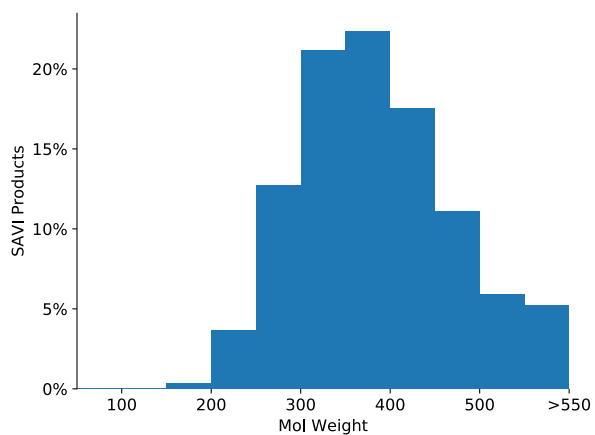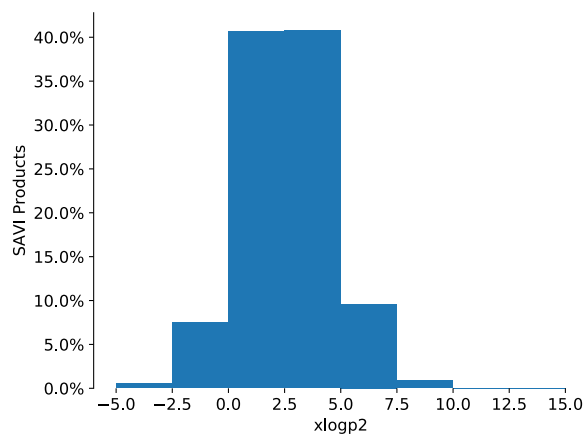

Supplement: 41597_2020_727_MOESM1_ESM.pdf [file 41597_2020_727_MOESM1_ESM.pdf]
